# Supplementary material for: The Impact of Regeneration and Climate Adaptations of Urban Green–Blue Assets on All-Cause Mortality: A 17-Year Longitudinal Study
Source: MDPI journal article supplement (doi:10.3390/ijerph17124577), 2020-06-25
Supplement: s1 [file s1]

Table S1. Linear mixed model results, without adjustments and adjusted for Scottish Multiple Deprivation Score (SIMD) decile scores for the domains Income, Housing, Employment, Education and Access.

| Effect                     | Estimate | 95% CI         | p-Value |
|----------------------------|----------|----------------|---------|
|                            |          |                |         |
| <b>Unadjusted model</b>    |          |                |         |
| (Intercept)                | 0.114    | -0.145, 0.373  | 0.392   |
| year                       | -0.032   | -0.046, -0.017 | 0.000   |
| distance: 500-1000m        | -0.198   | -0.603, 0.206  | 0.341   |
| distance: 1000-1500m       | -0.213   | -0.660, 0.235  | 0.356   |
| year:distance (500-1000m)  | 0.001    | -0.021, 0.024  | 0.923   |
| year:distance (1000-1500m) | 0.019    | -0.005, 0.044  | 0.130   |
|                            |          |                |         |
| <b>Adjusted model</b>      |          |                |         |
| (Intercept)                | 0.197    | -0.556, 0.771  | 0.758   |
| year                       | -0.012   | -0.064, 0.037  | 0.654   |
| distance: 500-1000m        | -0.094   | -0.420, 0.213  | 0.600   |
| distance: 1000-1500m       | 0.006    | -0.385, 0.334  | 0.975   |
| year:distance (500-1000m)  | -0.010   | -0.011, 0.035  | 0.423   |
| year:distance (1000-1500m) | 0.026    | 0.002, 0.055   | 0.106   |

Fixed effect: distance from 2001 data zone centroid to nearest portion of the canal.

Outcome measure: mortality rate ((N(deaths)/population)\*100).
