# Supplementary material for: The Impact of Regeneration and Climate Adaptations of Urban Green–Blue Assets on All-Cause Mortality: A 17-Year Longitudinal Study
Source: MDPI journal article supplement (doi:10.3390/ijerph17124577), 2020-06-25
Supplement: s1 [file s1]

## Supplementary File S2

### Results from supplementary Linear Mixed Model analysis of the mortality rates in the 0-500m and 500-1000m areas around the canal in North Glasgow, compared with the areas of Dowanhill and Hyndland in the West End of Glasgow.

We conducted a supplementary linear mixed model analysis with the main predictors linear time (years 2001-2017) and Glasgow area (Hyndland and Dowanhill (comparator), and 0-500m and 500-1000m buffer zones around the Glasgow canal, respectively) included as fixed factors in the model. Covariates in the adjusted analysis were SIMD domains Income; Employment; Housing, Education; and Geographic Access.

The longitudinal decrease in mortality rates in the comparator area of Hyndland and Dowanhill between 2001 and 2017 was -2.14% per year, 95% CI [-5.44%, 1.28%]. By comparison, the decreases in mortality rate in the 0-500 m and 500-1000m buffer zones around the canal were larger (0-500m: -3.12% per annum, 95% CI [-9.84%, 4.10%]; 500-1000m: -2.93% per annum, 95% CI [-9.80%, 4.46%]).

The model adjusted for SIMD deprivation levels suggested a longitudinal *increase* in mortality rates in the comparator area of 3.77% per annum, 95% CI [-2.68%, 12.18%]. By comparison, a decrease in mortality rates was found in the 0-500 m and 500-1000 m buffer zones around the canal (0-500m: -1.15% per annum, 95% CI [-13.25%, 12.57%]; 500-1000m: -0.45% [95% CI -11.60%, 14.23%]).

The number of data zones in the comparator area was small (10 data zones). Note also the wide confidence intervals.

Table. Linear mixed model results: Mortality rates in the 0-500m and 500-1000m areas around the canal in North Glasgow, compared with the areas of Dowanhill and Hyndland in the West End of Glasgow.

| Area                                | Compound Change in Mortality Rate per Annum | 95% Confidence Interval |
|-------------------------------------|---------------------------------------------|-------------------------|
| <i>Unadjusted analysis</i>          |                                             |                         |
| Comparator (Dowanhill and Hyndland) | 2.14% decrease p/a                          | -5.44%, 1.28%           |
| 0-500m buffer around canal          | 3.12% decrease p/a                          | -9.84%, 4.10%           |
| 500-1000 buffer around canal        | 2.93% decrease p/a                          | -9.80%, 4.46%           |
| <i>Adjusted analysis</i>            |                                             |                         |
| Comparator (Dowanhill and Hyndland) | 3.77% <i>increase</i> p/a                   | -2.68%, 12.18%          |
| 0-500m buffer around canal          | 1.15% decrease p/a                          | -13.25%, 12.57%         |
| 500-1000 buffer around canal        | 0.45% decrease p/a                          | -11.60%, 14.23%         |

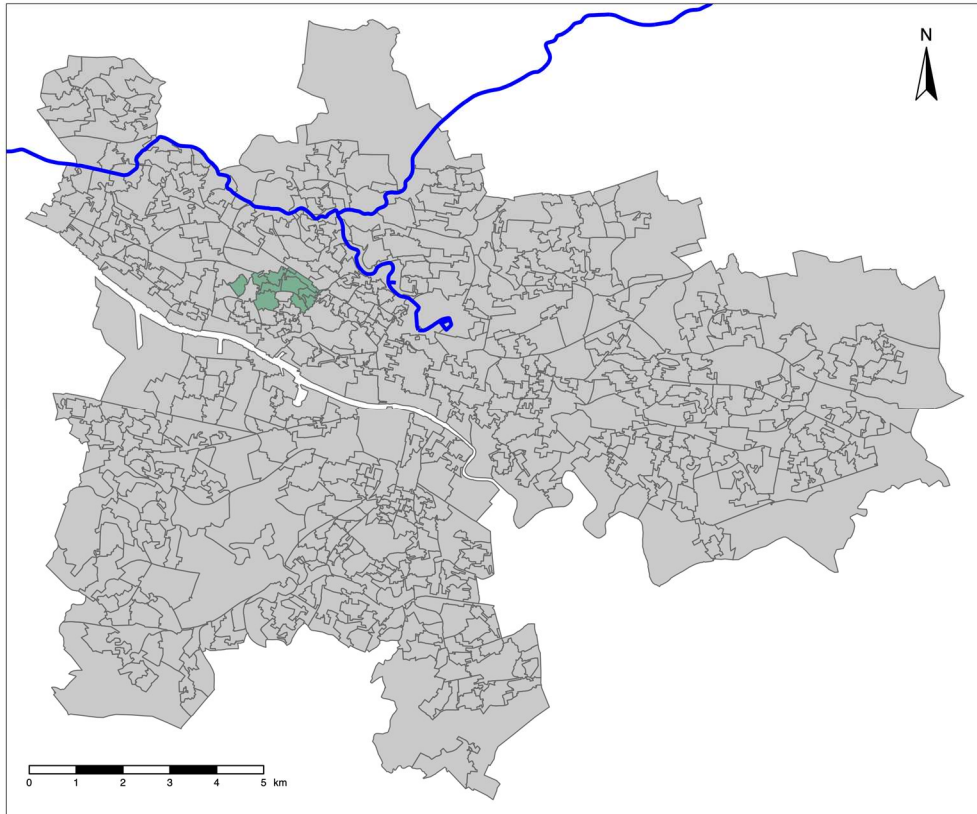

Figure. Location of comparator area in the West End of Glasgow (green), comprising Dowanhill and Hyndland. The blue line depicts the Lowlands canal.
