# Supplementary material for: The Impact of Regeneration and Climate Adaptations of Urban Green–Blue Assets on All-Cause Mortality: A 17-Year Longitudinal Study
Source: MDPI journal article supplement (doi:10.3390/ijerph17124577), 2020-06-25
Supplement: s1 [file s1]

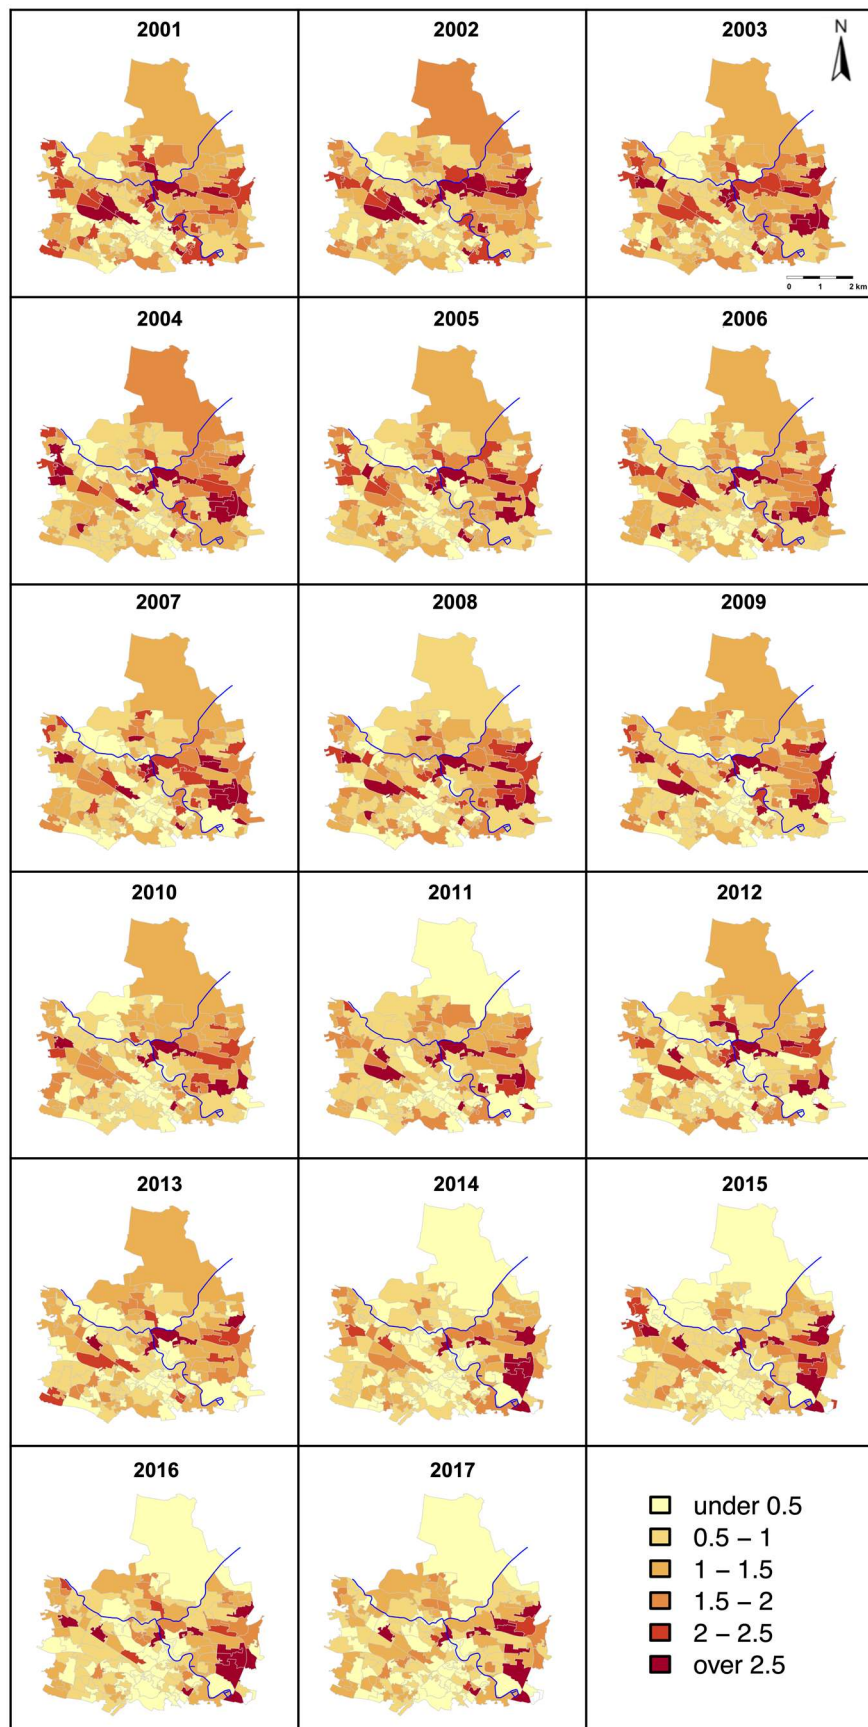

Supplementary Figure S1. Mortality rates (%) in the study area of North Glasgow for the study period 200-12017. The blue line depicts the Glasgow Canal. Data were obtained from National Records of Scotland.
